# Supplementary material
Source: publisher figshare collection journal article supplement (https://brill.figshare.com/articles/dataset/_/5539789)

## Distribution and diversity of amphibians in Albania

Márton Szabolcs<sup>1,2</sup>, Edvárd Mizsei<sup>3</sup>, Daniel Jablonski<sup>4</sup>, Balázs Vági<sup>3</sup>, Béla Mester<sup>1,2</sup>, Zolt Végvári<sup>3,5</sup>, Szabolcs Lengyel<sup>1</sup>

<sup>1</sup>Department of Tisza River Research, Danube Research Institute, Centre for Ecological Research, Hungarian Academy of Sciences, Bem tér 18/c, 4026 Debrecen, Hungary

<sup>2</sup>Pál Juhász-Nagy Doctoral School of Biology and Environmental Sciences, University of Debrecen, Egyetem tér 1, 4032 Debrecen, Hungary

<sup>3</sup>Department of Evolutionary Zoology and Human Biology, University of Debrecen, Egyetem tér 1, 4032 Debrecen, Hungary

<sup>4</sup>Department of Zoology, Comenius University of Bratislava, Mlynská dolina, Ilkovičova 6, 842 15 Bratislava, Slovakia

<sup>5</sup>Department of Conservation Zoology, University of Debrecen - Hortobágy National Park Directorate, Sumen utca 2, 4024 Debrecen, Hungary

### Supplementary Materials

**Figures S1-S14:** Distribution maps of amphibians in Albania

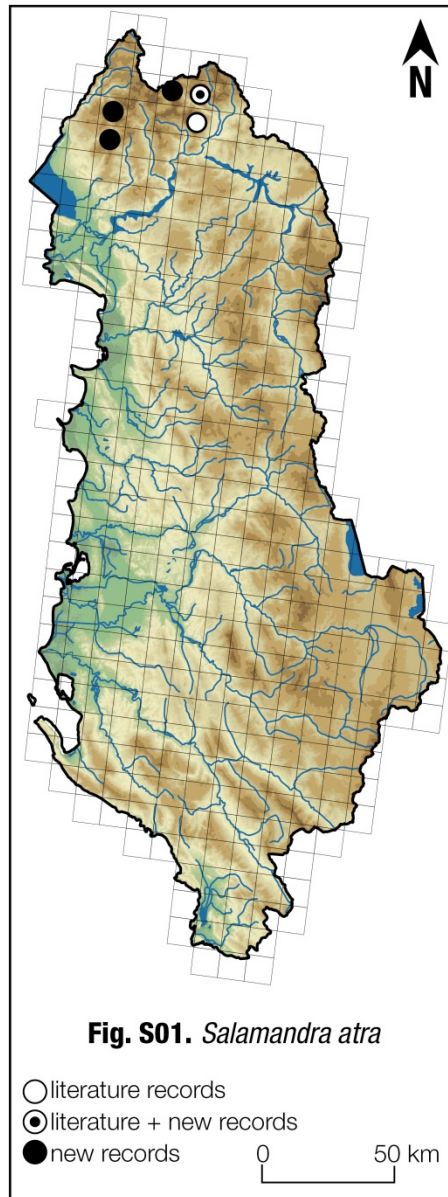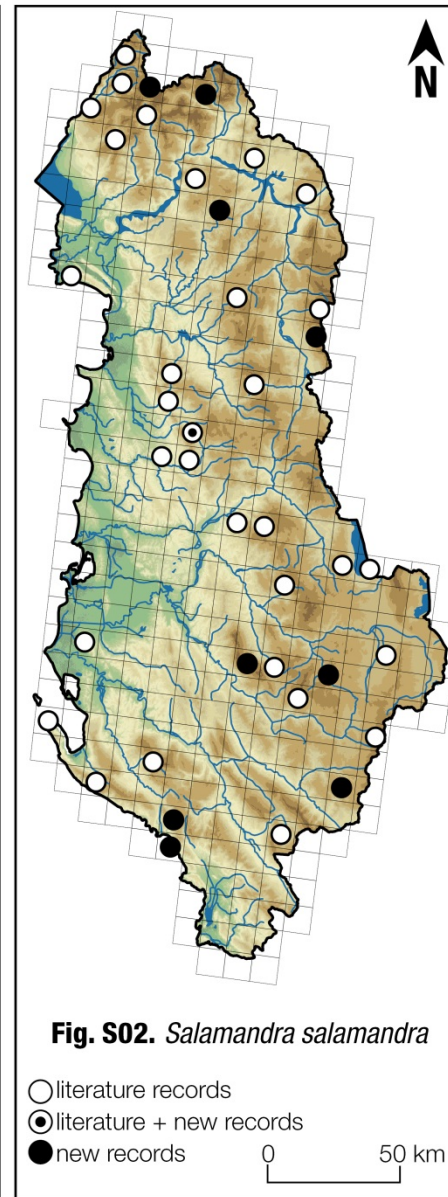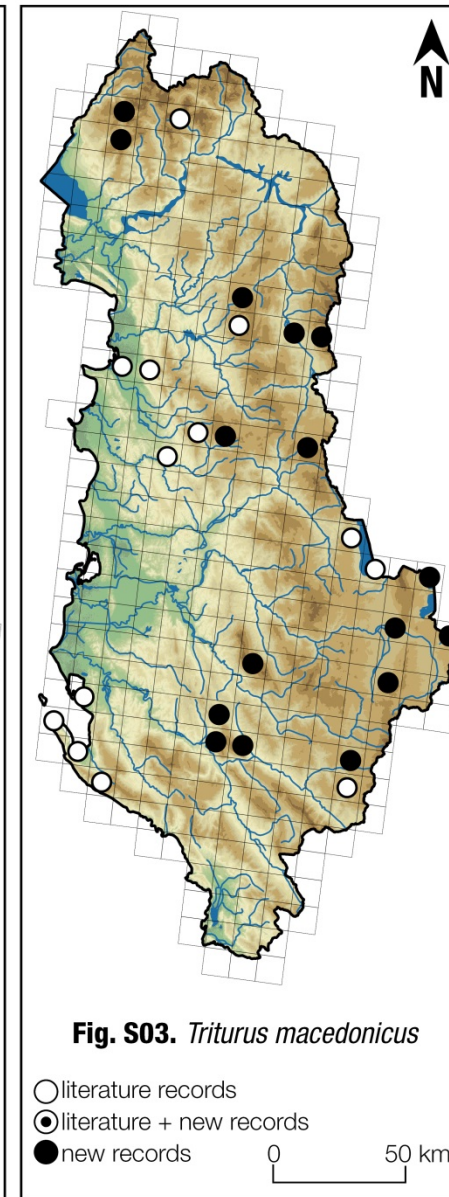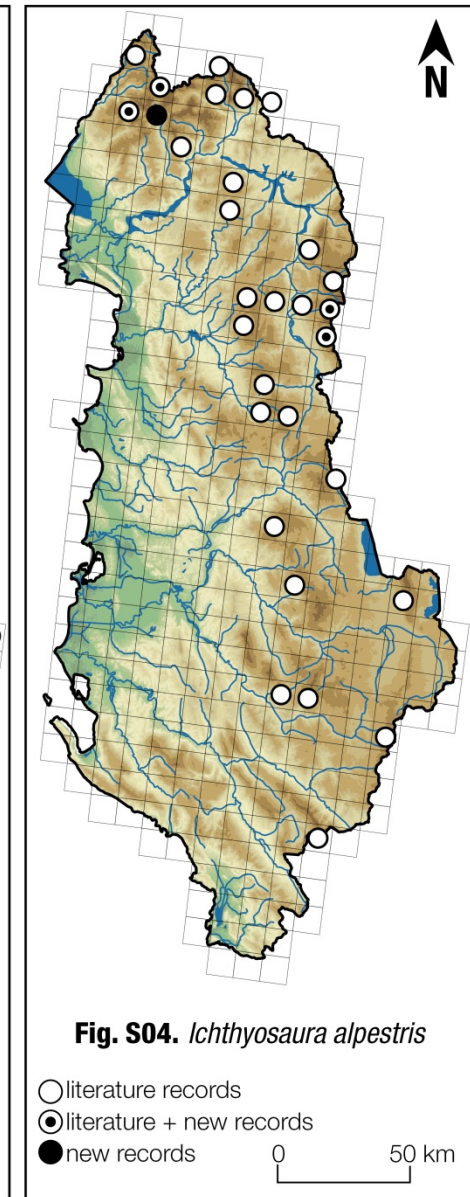



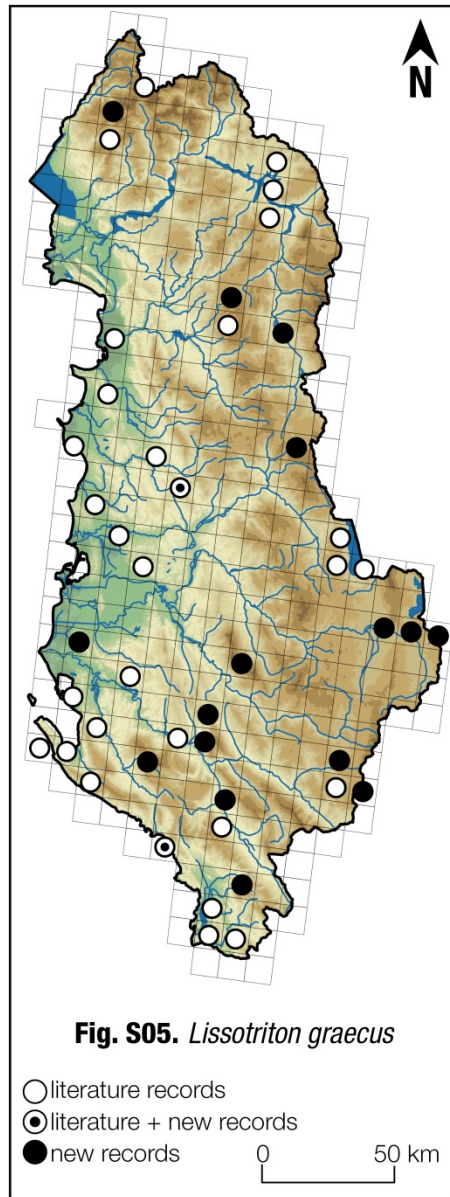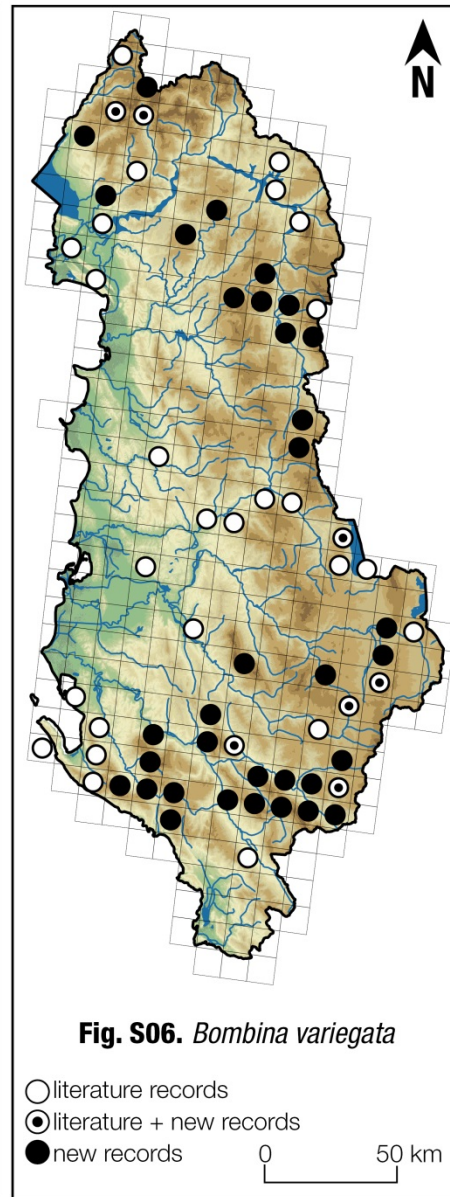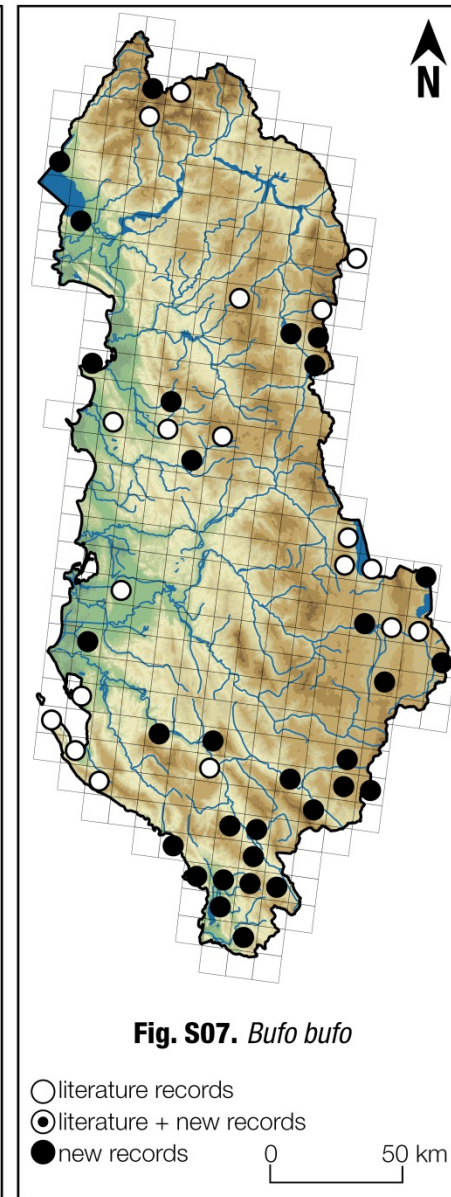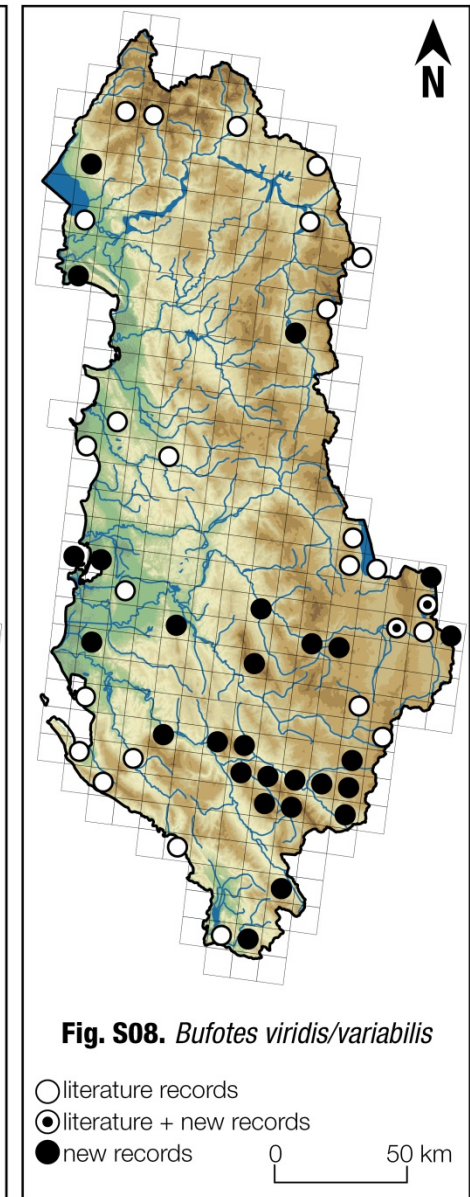



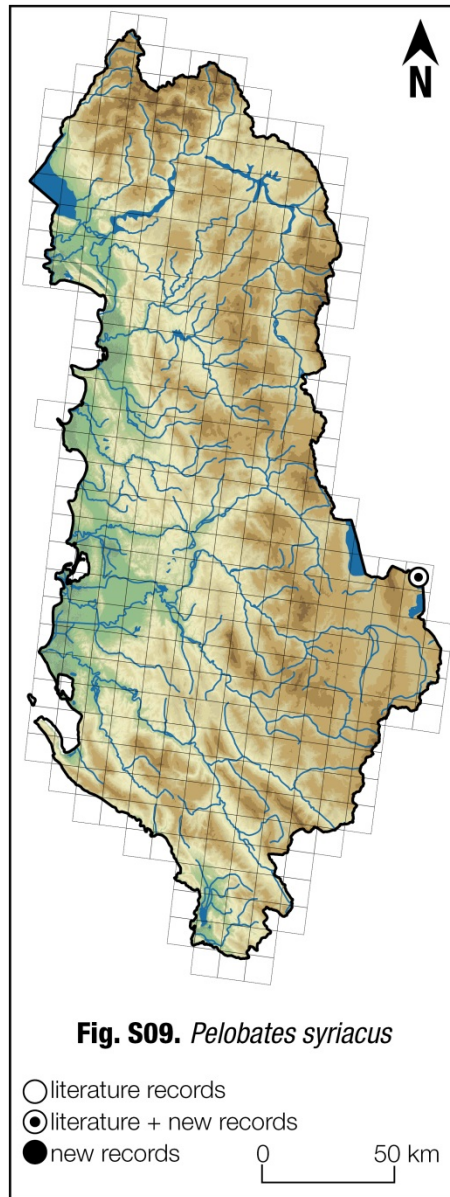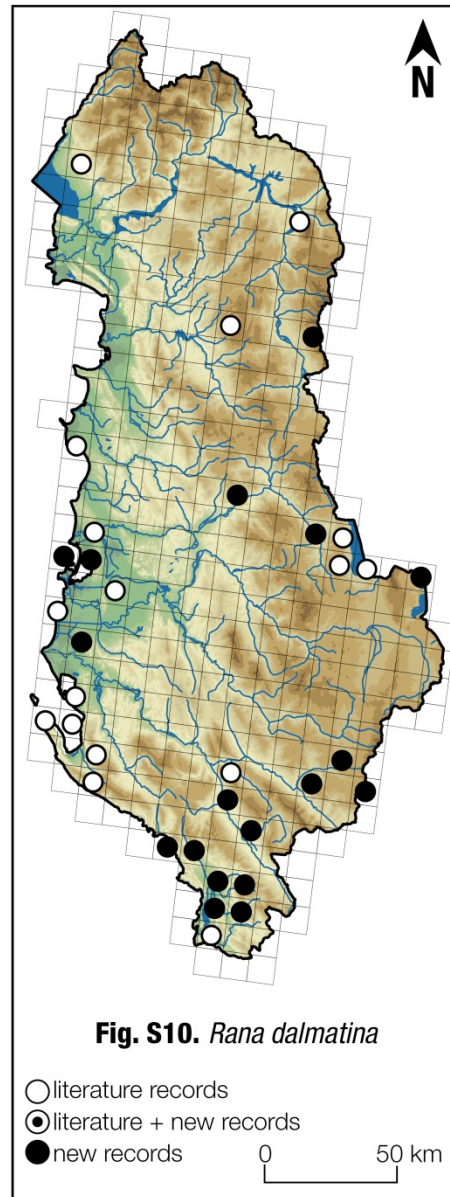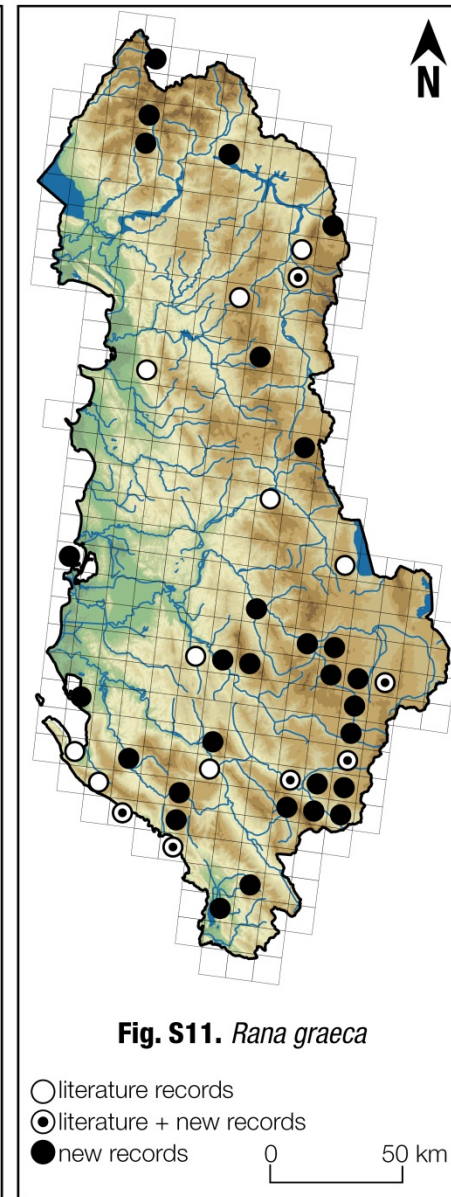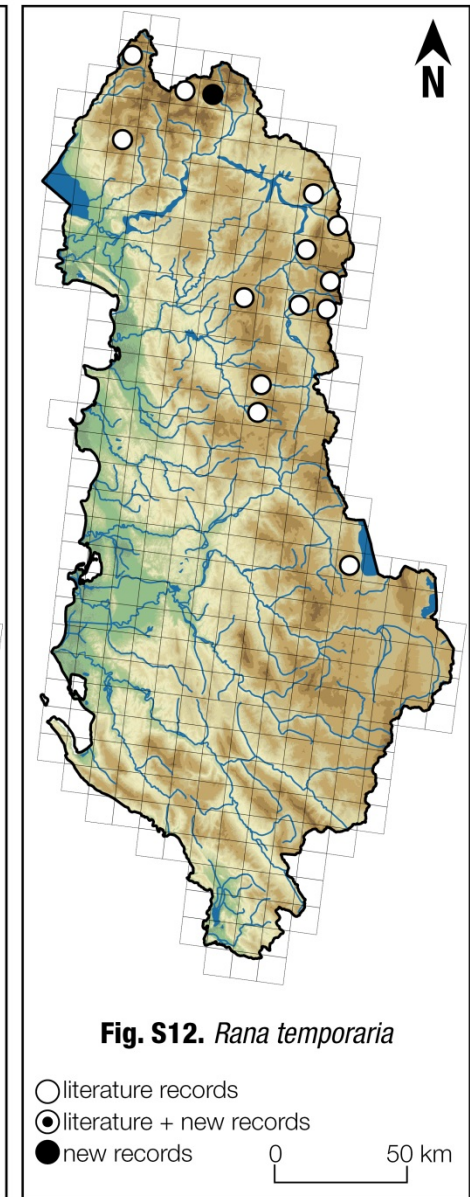

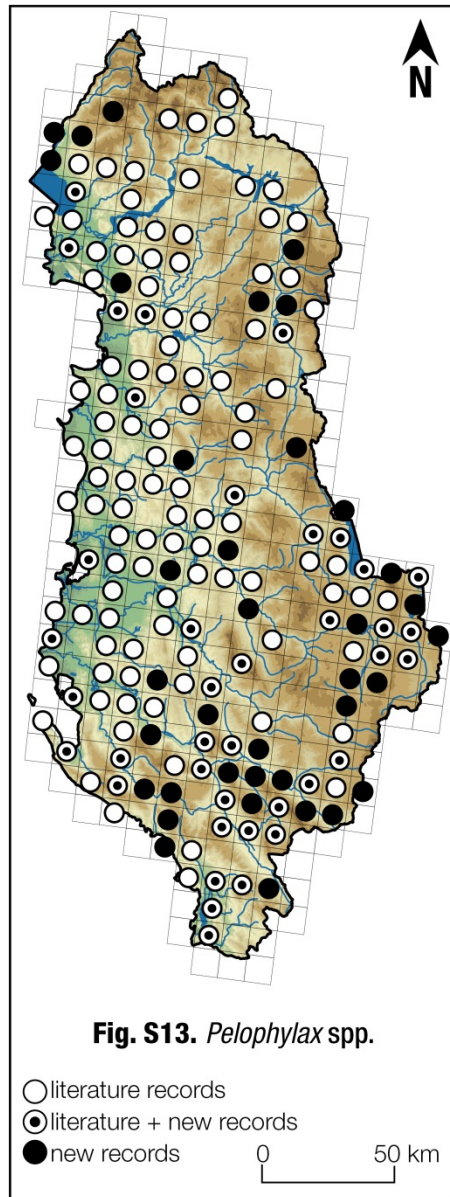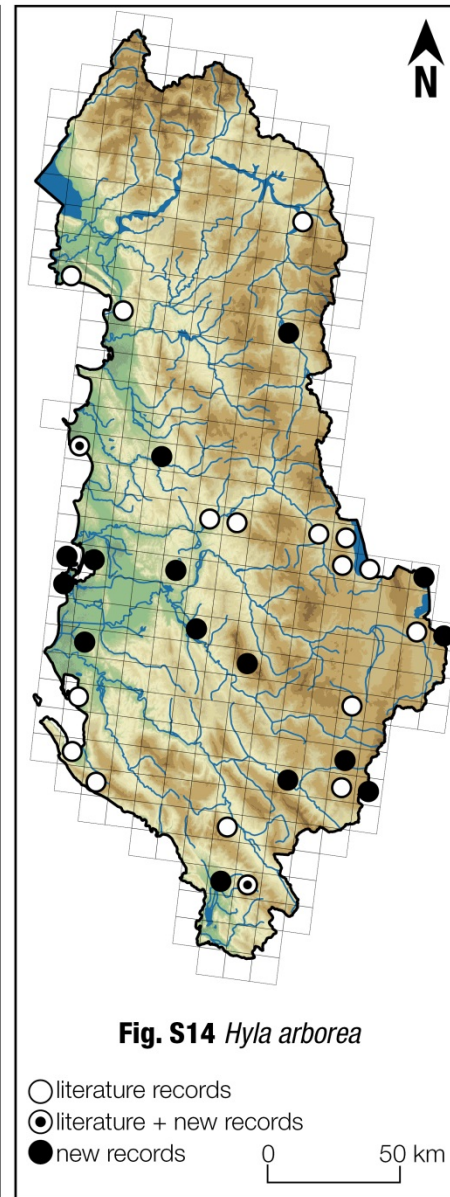

Supplement: Supplementary file 1 [file 1]
